# Supplementary material for: Major ion compositions, sources and risk assessment of karst stream under the influence of anthropogenic activities, Guizhou Province, Southwest China
Source: PeerJ. 2023 May 18;11:e15368. doi: 10.7717/peerj.15368 (PMC10200100; doi:10.7717/peerj.15368)
Supplement: Supplemental Information 1 — DO,EC, T, Na+, K+, Mg2+,Ca2+, F−, Cl-, NO3−, SO42−, HCO3− and δ34S of water in Youyu and Jinzhong streams. [file peerj-11-15368-s001.xlsx]

## Sheet: Sheet1
Month	Sample Id	pH	DO	EC	T	Na+	K+	Mg2+	Ca2+	F-	Cl-	NO3-	SO42-	HCO3-	TZ+	TZ-	(TZ+-TZ-)/TZ+	δ34S
			mg/L	µs/cm	℃	mmol/L											%	‰
june	G1	7.45	5.54	733	19.4	0.109874	0.0932128	0.641437	3.45253	0.0112945	0.0665229	0.131038	3.49483	1.12767	8.39101	8.32618	0.00772587	-8.23253
june	Z1	8.34	7.93	486	18.4	0.161896	0.0797615	0.294742	2.6025	0.0107888	0.111774	0.311368	0.912189	2.8656	6.03615	5.12391	0.15113	-5.67999
june	Z2	8.08	8.1	254	17.6	0.246874	0.0901487	0.806379	3.9929	0.0124264	0.134474	0.232341	3.78802	1.85733	9.93558	9.81262	0.0123753	-8.14645
june	G3	8.3	8	580	18.3	0.163335	0.0806641	0.299138	2.6505	0.0115956	0.129723	0.312252	1.41897	2.91867	6.14328	6.21017	-0.0108884	-8.08733
june	G4	7.4	8.3	730	20.3	0.300722	0.0789949	0.871696	3.1194	0.0110417	0.177214	0.0858394	2.74513	2.48087	8.3619	8.24523	0.0139533	-7.06465
July	G1	6.651	6.81	1759	21.6	0.351648	0.186208	1.93997	8.40634	0.011439	0.0348716	0.0384429	11.6399	0.543056	21.2305	23.9077	-0.126101
July	G2	8.106	7.9	768	21.8	0.150348	0.0589667	0.555267	3.81493	0.0107286	0.0947581	0.1599	2.95978	2.42778	8.9497	8.61273	0.0376519
July	Z1	7.72	7.55	548	21.2	0.105378	0.0385974	0.26545	2.71303	0.00966899	0.0903151	0.171401	1.51572	2.40222	6.10093	5.70504	0.0648898
July	Z2	7.431	7.74	1363	19.3	0.345583	0.0970231	1.71365	6.47142	0.0144975	0.103971	0.0904775	8.25729	0.707037	16.8127	17.4306	-0.0367468
July	G3	8.144	7.72	885	20.3	0.20167	0.0664949	0.85975	4.56975	0.0127033	0.0938153	0.137117	4.41203	1.9912	11.1272	11.0589	0.00613355
July	G4	8.223	10.09	524	25.4	0.313713	0.113195	0.66835	1.94103	0.0154126	0.208623	0.150038	1.61776	1.725	5.64566	5.3346	0.0550972
August	G1	7.116	6.16	1597	22.2	0.235178	0.0904128	1.8514	8.4093	0.0116558	0.0396599	0.0250576	9.62379	1.96884	20.847	21.2928	-0.0213847
August	G2	7.944	7.48	652	23.5	0.156696	0.0607846	0.423183	3.14542	0.0104276	0.106855	0.115694	2.0251	3.13556	7.35468	7.41874	-0.00870972
August	Z1	7.528	7.37	594	21.6	0.124257	0.0435256	0.316238	2.92399	0.0109092	0.0966342	0.094619	1.85562	2.67616	6.64824	6.58957	0.00882472
August	Z2	8.055	7.85	1475	19.4	0.395687	0.0980923	1.8637	7.25902	0.0122819	0.106108	0.0708128	8.45091	2.22406	18.7392	19.3151	-0.0307302
August	G3	8.39	7.74	879	21	0.212096	0.0673795	0.770667	4.13796	0.0108731	0.108171	0.102932	3.6414	2.74179	10.0967	10.2466	-0.0148403
August	G4	8.05	8.34	581	25.4	0.316922	0.111551	0.728508	2.24586	0.0154487	0.204245	0.108076	1.92238	2.1876	6.37722	6.36013	0.00267923
june	J1	8.03	7.26	637	18.5	0.7992	0.288969	0.783063	2.05773	0.0338234	0.454348	0.414319	1.13188	4.14362	6.76975	7.30987	-0.0797838	1.0453
june	J2	8.369	7.87	603	17.8	0.697439	0.247626	0.782787	1.89038	0.0292839	0.406082	0.235003	1.07672	3.94904	6.2914	6.77286	-0.0765266	0.384344
July	J1	7.94	6.17	564	21	0.674435	0.2657	0.597304	1.79882	0.0308493	0.43806	0.145578	0.851399	3.25833	5.73238	5.57562	0.027347
July	J2	8.316	7.36	526	21.6	0.63687	0.24	0.690887	1.91675	0.0274537	0.386005	0.334993	0.886406	3.25833	6.09215	5.7796	0.0513051
August	J1	8.053	5.4	677	21.9	0.776361	0.2193	0.944308	2.2631	0.0249732	0.534909	0.118246	1.03445	4.66688	7.41048	7.41391	-0.000462595
August	J2	8.297	6.51	527	25	0.514674	0.159659	0.760658	1.72548	0.0202892	0.380208	0.132171	0.833314	3.60954	5.64661	5.80884	-0.028729
june	Well water	7.06	3.53	572	16.5	0.218765	0.0693487	0.107067	2.91465	0.00857325	0.224509	0.576521	0.611689	4.0795	6.33155	6.11248	0.0345997
July	Well water	7.082	4.31	572	17	0.208178	0.038041	0.105571	2.97862	0.00789895	0.217229	0.392788	0.624781	3.91	6.41459	5.77748	0.0993227
August	Well water	7.106	4.5	598	17.4	0.208461	0.0329641	0.115887	3.15383	0.00812773	0.22212	0.316979	0.698175	4.7398	6.78085	6.68338	0.0143749
